# Supplementary material
Source: Research Square preprint supplement (doi:10.21203/rs.3.rs-8917613/v1)
Supplement: Supplementary file 1 [file 8cec360fa2e9f2d7ed1a5bbc.docx]

**Supplementary material**

**Figure S1. PBMCs clustering in BD patients receiving different medication regimens**


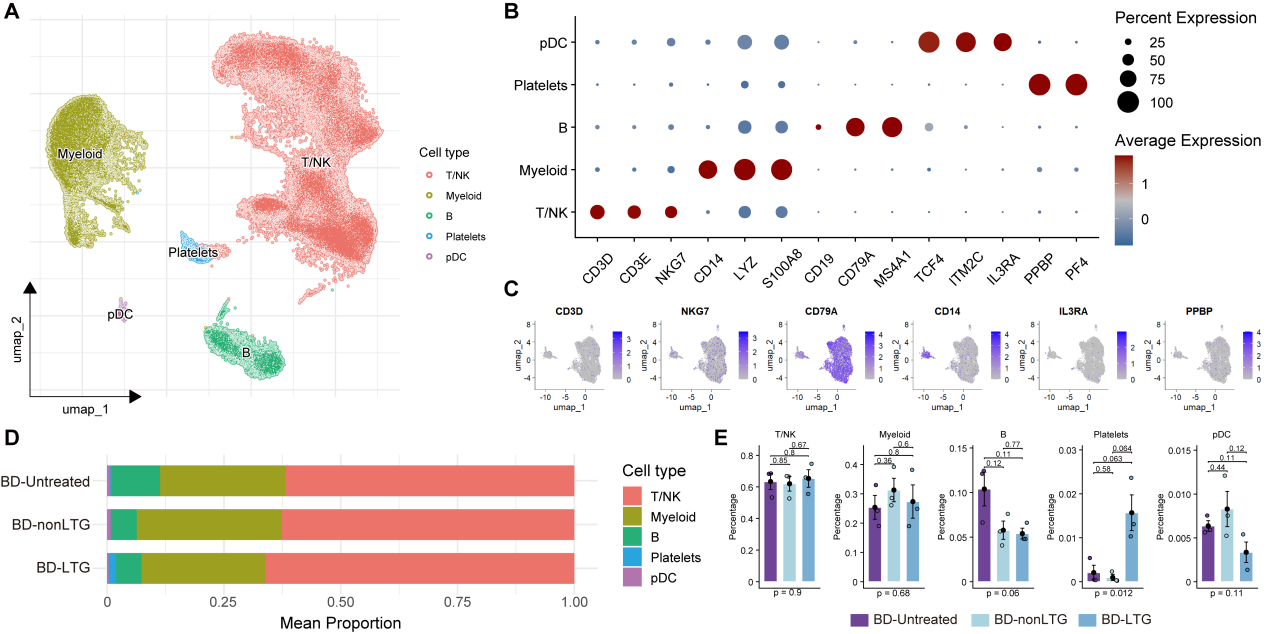


(A) UMAP visualization showing the clustering of all PBMCs from BD patients with different medication statuses (BD-Untreated, BD-nonLTG, BD-LTG groups). PBMCs were divided into five major clusters: T and NK cells, myeloid cells, B cells, platelets, and plasmacytoid dendritic cells (pDCs).

(B) Dot plot displaying the expression levels of canonical marker genes used for cell-type annotation. The T and NK cell cluster exhibited high expression of CD3D, CD3E, NKG7, and GNLY; the myeloid cell cluster showed high expression of LYZ, S100A8, and CD14; the B cell cluster highly expressed CD79A, MS4A1, and CD79B; the platelet cluster highly expressed PPBP and PF4; and the pDC cluster highly expressed TCF4, ITM2C, and IL3RA. Dot size represents the proportion of cells expressing each gene, and dot color intensity reflects the average expression level.

(C) UMAP plots showing the spatial distribution and expression of representative marker genes (CD3D, NKG7, CD79A, CD14, IL3RA, PPBP) across the identified clusters.

(D) Stacked bar charts showing the proportions of each cell cluster among PBMCs from BD patients with different medication regimens.

(E) Bar plots showing the proportions of PBMC subpopulations across medication groups and intergroup comparisons. No significant differences were observed between groups for each cluster.

**Figure S2. T/NK cells clustering in BD patients receiving different medication regimens**


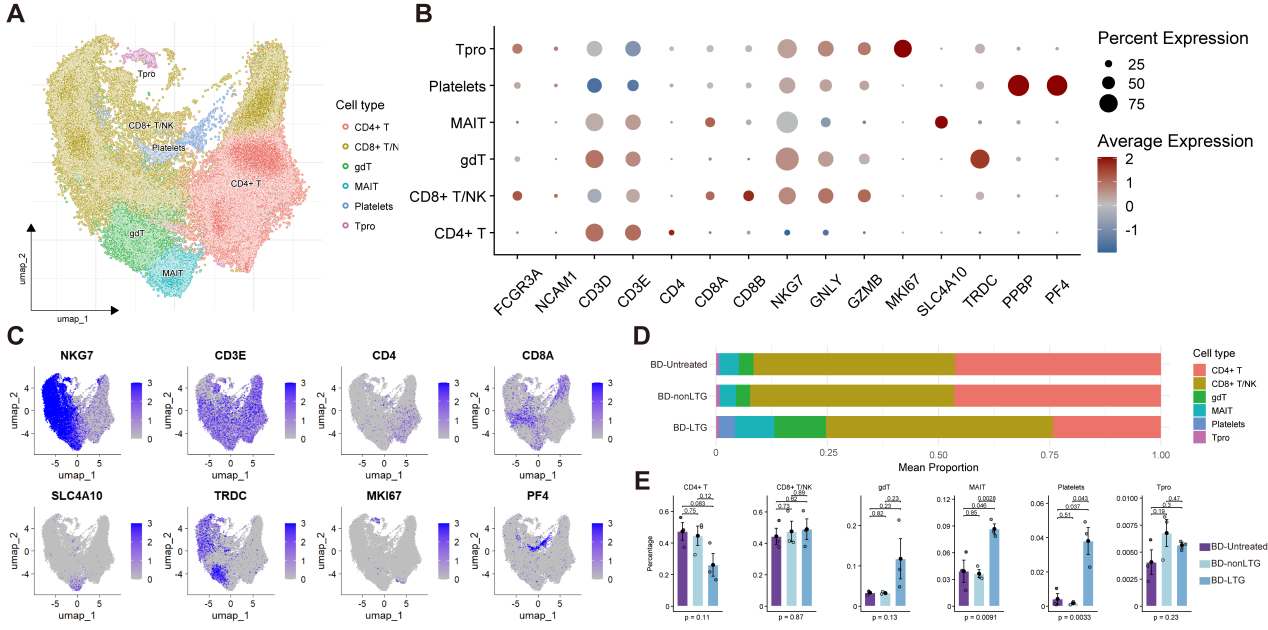


(A) UMAP visualize six distinct T and NK cell subclusters in BD patients from each group (BD-Untreated, BD-nonLTG, BD-LTG group). T/NK cells were divided into six major cluster: CD4+ T, CD8+ T/NK, gdT, MAIT, Platelets, Tpro.

(B) Dot plot illustrates the expression of marker genes used for cell-type annotation. Dot size indicates the proportion of cells expressing a given gene, and the dot color intensity reflects the average expression level.

(C) UMAP plots showing the spatial distribution and expression of representative marker genes (NKG7, CD3E, CD4, CD8A, SLC4A10, TRDC, MKI67, PF4) across the identified clusters.

(D) Stacked bar charts showing the proportions of each cell cluster among T/NK cells from BD patients with different medication regimens.

(E) Bar plots showing the proportions of T/NK subpopulations across medication groups and intergroup comparisons. No significant differences were observed between groups for each cluster.

**Figure S3. B cells clustering in BD patients receiving different medication regimens**


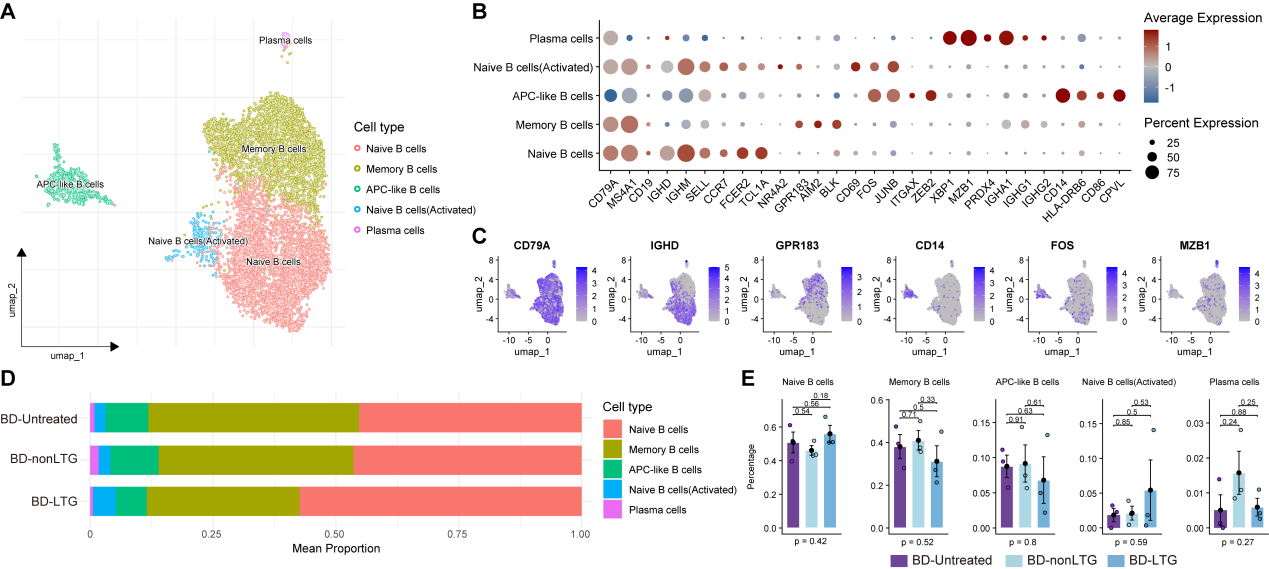


(A) UMAP visualization showing the clustering of B cells from BD patients with different groups (BD-Untreated, BD-nonLTG, BD-LTG groups). B cells were divided into five major clusters: Naive B cells, Naive B cells(Activated), Memory B cells, ABCs, Plasma cells.

(B) Dot plot displaying the expression levels of canonical marker genes used for cell-type annotation. The Naive B cells exhibited high expression of IGHM, SELL, CCR7, FCER2, TCL1A; the Naive B cells (Activated) showed high expression of SELL, TCL1A, FOS, JUN; the Memory B cells highly expressed GPR183, AIM2, BLK; the APC-like B cells highly expressed ITGAX, TBX21, CD14, HLA-DRB6; and Plasma cells highly expressed XBP1, MZB1, IGHA1, IGHG1. Dot size represents the proportion of cells expressing each gene, and dot color intensity reflects the average expression level.

(C) UMAP plots showing the spatial distribution and expression of representative marker genes (CD79A, IGHD, GPR183, CD14, FOS, MZB1) across the identified clusters.

(D) Stacked bar charts and Bar plots (E) showing the proportions of each cell cluster among B cells from BD patients with different medication regimens. The proportions of each clusters showed no statistically significant differences between groups.

**Figure S4. Myeloid cells clustering in BD patients receiving different medication regimens**
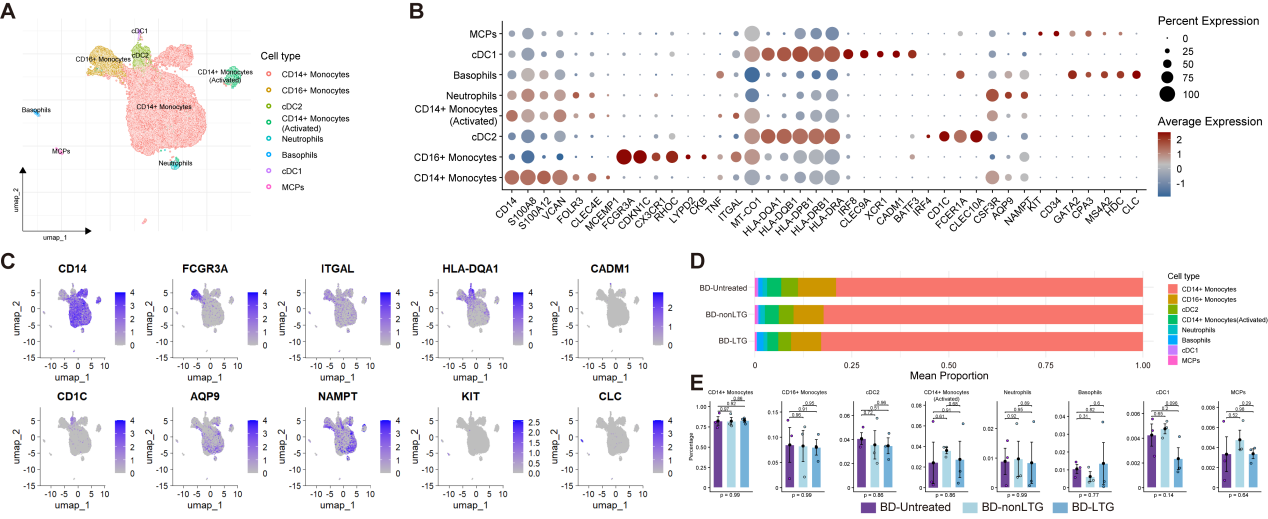


(A) UMAP visualization showing the clustering of Myeloid cells from BD patients with different groups (BD-Untreated, BD-nonLTG, BD-LTG groups). Myeloid cells were divided into eight major clusters: CD14+ Monocytes, CD14+ Monocytes (Activated), CD16+ Monocytes, cDC1, cDC2, Neutrophils, Basophils, MCPs.

(B) Dot plot displaying the expression levels of canonical marker genes used for cell-type annotation. The CD14+ Monocytes exhibited high expression of CD14, S100A8, S100A12; the CD14+ Monocytes (Activated) also exhibited TNF, ITGAL; the CD16+ Monocytes showed high expression of FCGR3A, CDKN1C, CX3CR1, RHOC; the cDC1 highly expressed HLA-DQA1, HLA-DQB1, IRF8, CLEC9A; the cDC2 highly expressed HLA-DQA1, HLA-DQB1, CD1C, FCER1A; and the Neutrophils highly expressed CSF3R, AQP9, NAMPT; the Basophils highly expressed GATA2, HDC, CLC; the MCPs highly expressed KIT, CD34, CPA3. Dot size represents the proportion of cells expressing each gene, and dot color intensity reflects the average expression level.

(C) UMAP plots showing the spatial distribution and expression of representative marker genes (CD14, FCGR3A, ITGAL, HLA-DQA1, CADM1, CD1C, AQP9, NAMPT, KIT, CLC) across the identified clusters.

(D) Stacked bar charts and Bar plots (E) showing the proportions of each cell cluster among Myeloid cells from BD patients with different medication regimens. The proportions of each clusters showed no statistically significant differences between groups.

**Figure S5.** **CD8+ T cells and NK cells clustering in BD patients receiving different medication regimens**


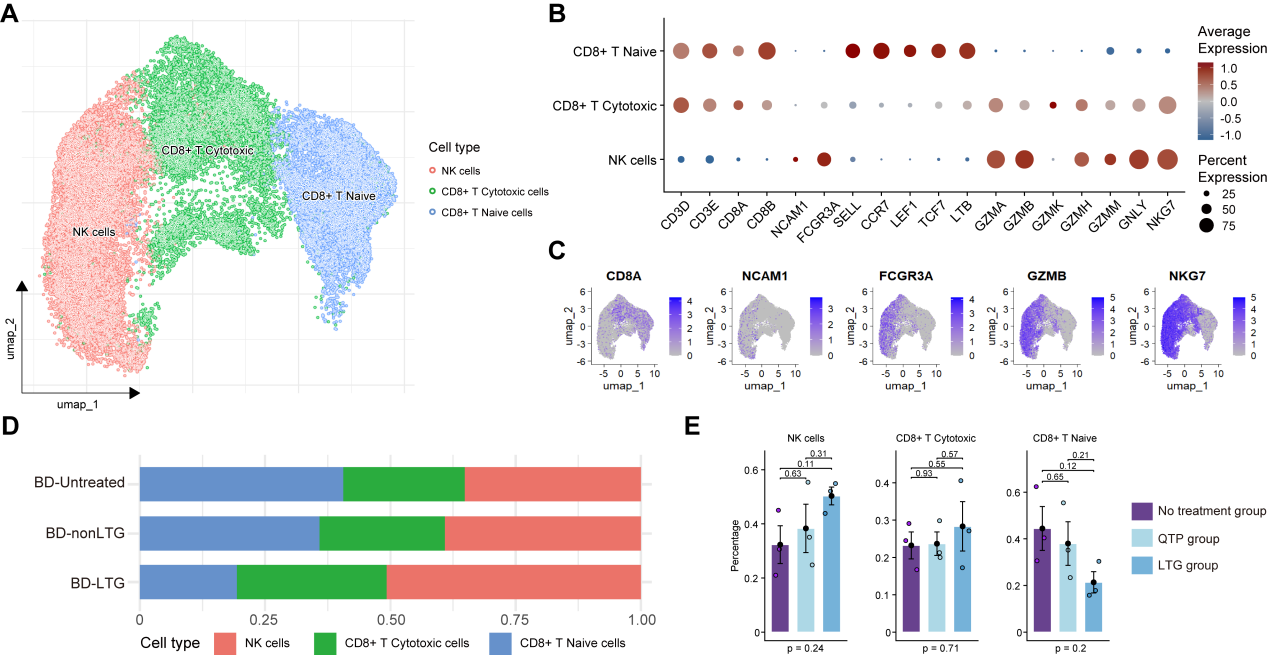


(A) UMAP visualization showing the clustering of CD8+ T and NK cells from BD patients with different groups (BD-Untreated, BD-nonLTG, BD-LTG groups). CD8+ T cells and NK cells were divided into three major clusters: NK cells, CD8+ T Cytotoxic cells, CD8+ T Naive cells.

(B) Dot plot displaying the expression levels of canonical marker genes used for cell-type annotation. The NK cells exhibited high expression of NCAM1, FCGR3A, NKG7; the CD8+ T Cytotoxic cells showed high expression of CD8A, GZMA, GZMK; and the CD8+ T Naive cells highly expressed CD8A, CD8B, CCR7, SELL, LEF1. Dot size represents the proportion of cells expressing each gene, and dot color intensity reflects the average expression level.

(C) UMAP plots showing the spatial distribution and expression of representative marker genes (CD8A, NCAM1, FCGR3A, GZMB, NKG7) across the identified clusters.

(D) Stacked bar charts and Bar plots (E) showing the proportions of each cell cluster among CD8+ T cells and NK cells from BD patients with different medication regimens. The proportions of each clusters showed no statistically significant differences between groups.
